# Supplementary material
Source: Springer Nature journal article supplement (https://www.springermedizin.de/resource/supplementary/12872_2013_706_MOESM1_ESM.pdf/9430726)
Supplement: MOESM1 [file 9430726]

**Additional file 1 Full model RR in MI patients for coronary angiography, transfer, and coronary angiography if transferred**

|                                         | Coronary angiography |         | Transfer to metropolitan hospital |         | Coronary angiography if transferred to metropolitan hospital |         |
|-----------------------------------------|----------------------|---------|-----------------------------------|---------|--------------------------------------------------------------|---------|
|                                         | RR (95% CI)          | p value | RR (95% CI)                       | p value | RR (95% CI)                                                  | p value |
| Aboriginal status                       |                      |         |                                   |         |                                                              |         |
| Non-Aboriginal                          | 1.00                 |         | 1.00                              |         | 1.00                                                         |         |
| Aboriginal                              | 0.97 (0.87-1.07)     | 0.510   | 1.00 (0.92-1.08)                  | 0.939   | 0.98 (0.91-1.05)                                             | 0.546   |
| Age groups                              |                      |         |                                   |         |                                                              |         |
| 25-34 years                             | 1.12 (0.95-1.32)     | 0.186   | 1.06 (0.93-1.21)                  | 0.376   | 1.06 (0.96-1.16)                                             | 0.250   |
| 35-44 years                             | 1.02 (0.93-1.12)     | 0.734   | 1.04 (0.96-1.13)                  | 0.302   | 0.98 (0.93-1.04)                                             | 0.478   |
| 45-54 years                             | 1.00                 |         | 1.00                              |         | 1.00                                                         |         |
| 55-64 years                             | 0.94 (0.86-1.03)     | 0.163   | 0.99 (0.93-1.07)                  | 0.864   | 0.95 (0.90-0.99)                                             | 0.048   |
| 65-74 years                             | 0.80 (0.71-0.90)     | <0.001  | 0.82 (0.74-0.91)                  | <0.001  | 0.97 (0.91-1.03)                                             | 0.314   |
| 75-84 years                             | 0.48 (0.40-0.58)     | <0.001  | 0.55 (0.47-0.64)                  | <0.001  | 0.87 (0.80-0.96)                                             | 0.005   |
| Sex                                     |                      |         |                                   |         |                                                              |         |
| Male                                    | 1.00                 |         | 1.00                              |         | 1.00                                                         |         |
| Female                                  | 0.95 (0.87-1.04)     | 0.313   | 0.96 (0.89-1.03)                  | 0.260   | 0.98 (0.94-1.03)                                             | 0.523   |
| Residential area                        |                      |         |                                   |         |                                                              |         |
| Regional                                | 1.00                 |         | 1.00                              |         | 1.00                                                         |         |
| Remote                                  | 1.01 (0.92-1.10)     | 0.875   | 1.05 (0.98-1.13)                  | 0.146   | 0.96 (0.91-1.01)                                             | 0.121   |
| SES quartiles                           |                      |         |                                   |         |                                                              |         |
| 1 <sup>st</sup> quartile <sup>(a)</sup> | 1.00                 |         | 1.00                              |         | 1.00                                                         |         |
| 2 <sup>nd</sup> quartile                | 1.12 (1.02-1.24)     | 0.020   | 1.10 (1.00-1.20)                  | 0.030   | 1.02 (0.97-1.07)                                             | 0.438   |
| 3 <sup>rd</sup> quartile                | 1.12 (1.01-1.24)     | 0.036   | 1.10 (1.01-1.21)                  | 0.036   | 1.01 (0.95-1.07)                                             | 0.686   |
| 4 <sup>th</sup> quartile <sup>(b)</sup> | 1.11 (0.99-1.25)     | 0.076   | 1.16 (1.06-1.27)                  | 0.002   | 0.95 (0.88-1.03)                                             | 0.220   |
| MI type <sup>(c)</sup>                  |                      |         |                                   |         |                                                              |         |
| Transmural                              | 1.00                 |         | 1.00                              |         | 1.00                                                         |         |
| Subendocardial/other                    | 0.97 (0.90-1.04)     | 0.348   | 0.96 (0.90-1.02)                  | 0.177   | 1.01 (0.97-1.05)                                             | 0.712   |
| Chronic pulmonary disease               |                      |         |                                   |         |                                                              |         |
| No                                      | 1.00                 |         | 1.00                              |         | 1.00                                                         |         |
| Yes                                     | 0.78 (0.64-0.94)     | 0.009   | 0.84 (0.72-0.99)                  | 0.032   | 0.92 (0.82-1.04)                                             | 0.185   |
| Diabetes                                |                      |         |                                   |         |                                                              |         |

|                |                  |        |                  |        |                  |        |
|----------------|------------------|--------|------------------|--------|------------------|--------|
| No             | 1.00             |        | 1.00             |        | 1.00             |        |
| Yes            | 0.94 (0.86-1.03) | 0.195  | 0.96 (0.89-1.04) | 0.372  | 0.97 (0.92-1.03) | 0.306  |
| HF             |                  |        |                  |        |                  |        |
| No             | 1.00             |        | 1.00             |        | 1.00             |        |
| Yes            | 0.64 (0.53-0.78) | <0.001 | 0.72 (0.62-0.84) | <0.001 | 0.88 (0.78-0.99) | 0.029  |
| Kidney disease |                  |        |                  |        |                  |        |
| No             | 1.00             |        | 1.00             |        | 1.00             |        |
| Yes            | 0.62 (0.48-0.80) | <0.001 | 0.90 (0.76-1.06) | 0.213  | 0.69 (0.56-0.84) | <0.001 |

RRs are presented for patients without private insurance

RR=Risk ratio; 95% CI=95% confidence interval;

HF=heart failure; MI=myocardial infarction; SES=socio-economic status

(a) most disadvantaged; (b) least disadvantaged; (c) MI type was based on ICD-10-AM coding terminology
